# Supplementary material for: An intramolecular vibrationally excited intermolecular potential energy surface and predicted 2OH overtone spectroscopy of H2O–Kr
Source: Royal Society of Chemistry journal article supplement (doi:10.1039/d3cp04126c), 2023-01-01
Supplement: d3cp04126c1.zip [file d3cp04126c1.zip]

# An intramolecular vibrationally excited intermolecular potential energy surfaces and predicted 2OH overtone spectroscopy of $\text{H}_2\text{O-Kr}$

Xiao-Long Zhang,<sup>a</sup> Shu-Bin Yang,<sup>a</sup> Dan Hou,<sup>c\*</sup> and Hui Li<sup>b\*</sup>

<sup>a</sup>*Key Laboratory of Chemical Utilization of Plant Resources of Nanchang,*

*College of Science,*

*Jiangxi Agricultural University,*

*Nanchang 330045, P.R.China*

<sup>b</sup>*Institute of Theoretical Chemistry,*

*College of Chemistry,*

*Jilin University, 2519 Jiefang Road,*

*Changchun 130023, P.R.China*

<sup>c</sup>*The Laboratory of Theoretical and Computational Chemistry,*

*School of Chemistry and Chemical Engineering,*

*Yantai University, Yantai 264005, P.R.China*

(Dated: October 7, 2023)

---

\* E-mail address Prof\_huili@jlu.edu.cn

**Table SI.** Calculated rovibrational energy levels (in  $\text{cm}^{-1}$ ) of the  $\text{H}_2\text{O}-^{84}\text{Kr}$  complex from the vibrationally averaged  $V_{\text{MLR}}$  PESs at the  $|00^+\rangle$  state.

| $J = 5$                                 | $J = 6$ | $J = 7$  | $J = 8$ | $J = 9$  | $J = 10$ |
|-----------------------------------------|---------|----------|---------|----------|----------|
| $k=\text{even}, (-1)^{J+P}=\text{even}$ |         |          |         |          |          |
| -116.850                                | 115.908 | -114.810 | 113.555 | -112.145 | -110.580 |
| -87.489                                 | -86.576 | -85.511  | -84.294 | -82.927  | -81.409  |
| -79.968                                 | -79.050 | -77.980  | -76.759 | -75.389  | -73.870  |
| -75.426                                 | -74.497 | -73.413  | -72.174 | -70.780  | -69.229  |
| -57.215                                 | -56.370 | -55.385  | -54.261 | -52.998  | -51.596  |
| -53.328                                 | -52.623 | -51.763  | -50.749 | -49.581  | -48.258  |
| -50.862                                 | -49.717 | -48.421  | -46.974 | -45.379  | -43.637  |
| -44.662                                 | -43.896 | -42.996  | -41.963 | -40.793  | -39.487  |
| -41.959                                 | -41.029 | -39.949  | -38.721 | -37.345  | -35.823  |
| -38.695                                 | -37.718 | -36.580  | -35.281 | -33.821  | -32.202  |
| $k=\text{even}, (-1)^{J+P}=\text{odd}$  |         |          |         |          |          |
| -79.911                                 | 78.967  | 77.868   | -76.611 | -75.199  | -73.631  |
| -52.227                                 | -51.299 | -50.217  | -48.982 | -47.593  | -46.050  |
| -42.178                                 | -41.324 | -40.327  | -39.186 | -37.902  | -36.474  |
| -38.698                                 | -37.724 | -36.590  | -35.297 | -33.845  | -32.236  |
| -23.104                                 | -22.296 | -21.343  | -20.245 | -19.001  | -17.611  |
| -21.937                                 | -20.971 | -19.854  | -18.588 | -17.174  | -15.613  |
| -17.968                                 | -17.227 | -16.330  | -15.276 | -14.066  | -12.701  |
| -15.804                                 | -14.679 | -13.408  | -11.994 | -10.442  | -8.759   |
| -10.781                                 | -9.939  | -8.951   | -7.815  | -6.525   | -5.075   |
| $k=\text{odd}, (-1)^{J+P}=\text{even}$  |         |          |         |          |          |
| -100.688                                | -99.764 | 98.685   | -97.454 | 96.069   | -94.531  |
| -88.413                                 | -87.460 | -86.348  | -85.079 | -83.652  | -82.069  |
| -79.519                                 | -78.560 | -77.440  | -76.162 | -74.724  | -73.126  |
| -67.187                                 | -66.303 | -65.272  | -64.095 | -62.772  | -61.303  |
| -54.963                                 | -54.072 | -53.034  | -51.849 | -50.518  | -49.040  |
| -44.970                                 | -44.077 | -43.036  | -41.848 | -40.514  | -39.037  |
| -44.138                                 | -43.344 | -42.414  | -41.344 | -40.133  | -38.777  |
| -38.588                                 | -37.624 | -36.508  | -35.245 | -33.836  | -32.287  |
| -33.803                                 | -32.929 | -31.909  | -30.740 | -29.423  | -27.957  |
| $k=\text{odd}, (-1)^{J+P}=\text{odd}$   |         |          |         |          |          |
| -88.471                                 | -87.541 | -86.456  | -85.218 | -83.825  | 82.280   |
| -79.559                                 | -78.615 | -77.514  | -76.256 | -74.842  | -73.271  |
| -62.267                                 | -61.317 | -60.210  | -58.945 | -57.524  | -55.945  |
| -55.014                                 | -54.144 | -53.129  | -51.971 | -50.669  | -49.225  |
| -45.004                                 | -44.125 | -43.099  | -41.928 | -40.612  | -39.150  |
| -38.768                                 | -37.864 | -36.808  | -35.603 | -34.247  | -32.741  |
| -30.462                                 | -29.585 | -28.563  | -27.396 | -26.086  | -24.632  |
| -29.486                                 | -28.525 | -27.405  | -26.129 | -24.699  | -23.117  |
| -26.996                                 | -26.193 | -25.257  | -24.186 | -22.979  | -21.634  |
| -16.732                                 | -15.926 | -14.985  | -13.911 | -12.705  | -11.366  |

**Table SII.** Calculated rovibrational energy levels (in  $\text{cm}^{-1}$ ) of the  $\text{H}_2\text{O}-^{84}\text{Kr}$  complex from the vibrationally averaged  $V_{\text{MLR}}$  PESs at the  $|02^- \rangle$  state.

| $J = 0$  | $J = 1$  | $J = 2$                                 | $J = 3$  | $J = 4$  |
|----------|----------|-----------------------------------------|----------|----------|
|          |          | $k=\text{even}, (-1)^{J+P}=\text{even}$ |          |          |
| -123.273 | -123.116 | -122.803                                | -122.332 | -121.705 |
| -95.760  | -95.608  | -95.302                                 | -94.844  | -94.234  |
|          | -88.732  | -88.418                                 | -87.947  | -87.319  |
| -81.113  | -80.964  | -80.664                                 | -80.215  | -79.616  |
| -64.799  | -64.659  | -64.377                                 | -63.954  | -63.390  |
|          | -61.701  | -61.473                                 | -61.118  | -60.630  |
| -60.131  | -59.931  | -59.536                                 | -58.956  | -58.200  |
| -50.009  | -49.924  | -49.729                                 | -49.410  | -48.957  |
|          | -49.359  | -48.993                                 | -48.472  | -47.804  |
| -37.775  | -37.644  | -45.807                                 | -45.318  | -44.668  |
|          |          | $k=\text{even}, (-1)^{J+P}=\text{odd}$  |          |          |
|          | -88.732  | -88.418                                 | -87.946  | -87.318  |
|          | -61.657  | -61.347                                 | -60.882  | -60.262  |
|          | -49.412  | -49.129                                 | -48.703  | -48.136  |
|          |          | -45.807                                 | -45.319  | -44.669  |
|          |          | -32.043                                 | -31.665  | -31.148  |
|          | -31.642  | -31.293                                 | -30.781  | -30.110  |
|          | -26.660  | -26.494                                 | -26.192  | -25.741  |
|          | -25.783  | -25.317                                 | -24.671  | -23.860  |
|          | -18.010  | -17.737                                 | -17.328  | -16.782  |
|          |          | -11.781                                 | -11.333  | -10.738  |
|          |          | $k=\text{odd}, (-1)^{J+P}=\text{even}$  |          |          |
| -108.269 | 108.114  | -107.806                                | -107.343 | -106.727 |
|          | -94.868  | -94.552                                 | -94.078  | -93.447  |
|          | -88.393  | -88.073                                 | -87.592  | -86.951  |
| -75.564  | -75.415  | -75.117                                 | -74.670  | -74.075  |
|          | -61.568  | -61.270                                 | -60.822  | -60.225  |
|          | -53.450  | -53.150                                 | -52.701  | -52.102  |
| -52.357  | -52.228  | -51.969                                 | -51.579  | -51.058  |
|          | -47.179  | -46.852                                 | -46.364  | -45.716  |
| -41.493  | -41.347  | -41.055                                 | -40.617  | -40.034  |
|          |          | -38.626                                 | -38.142  | -37.498  |
|          |          | $k=\text{odd}, (-1)^{J+P}=\text{odd}$   |          |          |
|          | -94.872  | -94.563                                 | -94.099  | -93.482  |
|          | -88.396  | -88.080                                 | -87.607  | -86.976  |
|          | -70.196  | -69.879                                 | -69.404  | -68.771  |
|          | -61.571  | -61.279                                 | -60.841  | -60.257  |
|          | -53.452  | -53.157                                 | -52.714  | -52.124  |
|          | -47.193  | -46.896                                 | -46.450  | -45.855  |
|          | -37.980  | -38.626                                 | -38.143  | -37.498  |
|          |          | -37.685                                 | -37.244  | -36.656  |
|          | -32.478  | -32.209                                 | -31.806  | -31.268  |
|          | -24.553  | -24.280                                 | -23.872  | -23.328  |

**Table SII.** Calculated rovibrational energy levels (in  $\text{cm}^{-1}$ ) of the  $\text{H}_2\text{O}-^{84}\text{Kr}$  complex from the vibrationally averaged  $V_{\text{MLR}}$  PESs at the  $|02^- \rangle$  state.

| $J = 5$                                 | $J = 6$  | $J = 7$  | $J = 8$  | $J = 9$  | $J = 10$ |
|-----------------------------------------|----------|----------|----------|----------|----------|
| $k=\text{even}, (-1)^{J+P}=\text{even}$ |          |          |          |          |          |
| -120.922                                | -119.982 | 118.886  | -117.635 | -116.228 | -114.666 |
| -93.471                                 | -92.555  | -91.488  | -90.268  | -88.897  | -87.374  |
| -86.535                                 | -85.596  | -84.501  | -83.251  | -81.848  | -80.292  |
| -78.867                                 | -77.968  | -76.920  | -75.722  | -74.375  | -72.878  |
| -62.685                                 | -61.838  | -60.850  | -59.719  | -58.446  | -57.029  |
| -60.001                                 | -59.228  | -58.309  | -57.242  | -56.027  | -54.663  |
| -57.274                                 | -56.184  | -54.934  | -53.526  | -51.963  | -50.246  |
| -48.368                                 | -47.643  | -46.780  | -45.779  | -44.641  | -43.366  |
| -46.993                                 | -46.039  | -44.943  | -43.705  | -42.325  | -40.804  |
| -43.855                                 | -42.881  | -41.746  | -40.450  | -38.995  | -37.382  |
| $k=\text{even}, (-1)^{J+P}=\text{odd}$  |          |          |          |          |          |
| -86.533                                 | 85.592   | -84.494  | -83.240  | 81.830   | -80.265  |
| -59.487                                 | -58.558  | -57.475  | -56.237  | -54.846  | -53.301  |
| -47.427                                 | -46.574  | -45.579  | -44.441  | -43.160  | -41.736  |
| -43.858                                 | -42.887  | -41.757  | -40.467  | -39.020  | -37.416  |
| -30.490                                 | -29.686  | -28.738  | -27.643  | -26.401  | -25.012  |
| -29.285                                 | -28.307  | -27.178  | -25.898  | -24.469  | -22.891  |
| -25.138                                 | -24.382  | -23.471  | -22.406  | -21.186  | -19.813  |
| -22.887                                 | -21.756  | -20.471  | -19.032  | -17.444  | -15.709  |
| -16.098                                 | -15.276  | -14.315  | -13.214  | -11.971  | -10.584  |
| -9.993                                  | -9.102   | -8.063   | -6.878   | -5.547   | -4.072   |
| $k=\text{odd}, (-1)^{J+P}=\text{even}$  |          |          |          |          |          |
| -105.956                                | -105.032 | -103.954 | -102.723 | -101.339 | -99.802  |
| -92.658                                 | -91.712  | -90.610  | -89.351  | -87.937  | -86.368  |
| -86.150                                 | -85.189  | -84.068  | -82.786  | -81.345  | -79.744  |
| -73.331                                 | -72.439  | -71.399  | -70.211  | -68.875  | -67.393  |
| -59.479                                 | -58.586  | -57.544  | -56.355  | -55.020  | -53.538  |
| -51.354                                 | -50.457  | -49.411  | -48.216  | -46.875  | -45.390  |
| -50.403                                 | -49.614  | -48.689  | -47.625  | -46.422  | -45.075  |
| -44.910                                 | -43.948  | -42.832  | -41.565  | -40.149  | -38.587  |
| -39.305                                 | -38.429  | -37.409  | -36.242  | -34.929  | -33.471  |
| $k=\text{odd}, (-1)^{J+P}=\text{odd}$   |          |          |          |          |          |
| -92.711                                 | -91.786  | -90.708  | -89.477  | -88.094  | -86.559  |
| -86.187                                 | -85.241  | -84.136  | -82.875  | -81.456  | -79.879  |
| -67.979                                 | -67.030  | -65.923  | -64.659  | -63.238  | -61.661  |
| -59.527                                 | -58.652  | -57.632  | -56.468  | -55.161  | -53.710  |
| -51.386                                 | -50.502  | -49.470  | -48.292  | -46.967  | -45.496  |
| -45.112                                 | -44.220  | -43.179  | -41.990  | -40.652  | -39.166  |
| -36.694                                 | -35.730  | -34.606  | -33.324  | -31.883  | -30.287  |
| -35.921                                 | -35.040  | -34.013  | -32.840  | -31.522  | -30.058  |
| -30.597                                 | -29.793  | -28.855  | -27.784  | -26.582  | -25.247  |
| -22.648                                 | -21.833  | -20.883  | -19.798  | -18.579  | -17.226  |

**Table SIII.** Calculated rovibrational energy levels (in  $\text{cm}^{-1}$ ) of the  $\text{H}_2\text{O}-^{84}\text{Kr}$  complex from the vibrationally averaged  $V_{\text{MLR}}$  PESs at the  $|02^+\rangle$  state.

| $J = 0$  | $J = 1$  | $J = 2$                                 | $J = 3$  | $J = 4$  |
|----------|----------|-----------------------------------------|----------|----------|
|          |          | $k=\text{even}, (-1)^{J+P}=\text{even}$ |          |          |
| -120.686 | -120.529 | -120.215                                | -119.744 | -119.116 |
| -92.625  | -92.473  | -92.168                                 | -91.711  | -91.101  |
|          | -85.629  | -85.316                                 | -84.847  | -84.222  |
| -79.330  | -79.179  | -78.876                                 | -78.423  | -77.818  |
| -61.999  | -61.859  | -61.578                                 | -61.157  | -60.596  |
|          | -58.726  | -58.557                                 | -58.261  | -57.823  |
| -57.885  | -57.642  | -57.188                                 | -56.551  | -55.746  |
| -48.388  | -48.277  | -48.051                                 | -47.704  | -47.230  |
|          | -47.214  | -46.879                                 | -46.385  | -45.738  |
|          |          | -44.188                                 | -43.696  | -43.041  |
|          |          | $k=\text{even}, (-1)^{J+P}=\text{odd}$  |          |          |
|          | -85.628  | 85.314                                  | -84.842  | -84.213  |
|          | -58.639  | -58.329                                 | -57.864  | -57.245  |
|          | -47.242  | -46.960                                 | -46.537  | -45.971  |
|          |          | -44.189                                 | -43.697  | -43.043  |
|          |          | -29.560                                 | -29.164  | -28.632  |
|          | -28.834  | -28.505                                 | -28.014  | -27.364  |
|          | -24.248  | -24.087                                 | -23.785  | -23.334  |
|          | -23.468  | -22.995                                 | -22.347  | -21.535  |
|          | -16.085  | -15.813                                 | -15.406  | -14.862  |
|          |          | -10.466                                 | -10.017  | -9.418   |
|          |          | $k=\text{odd}, (-1)^{J+P}=\text{even}$  |          |          |
| -105.374 | -105.219 | -104.911                                | -104.449 | -103.833 |
|          | -92.651  | -92.333                                 | -91.855  | -91.218  |
|          | -85.383  | -85.064                                 | -84.586  | -83.948  |
| -72.450  | -72.302  | -72.005                                 | -71.561  | -70.968  |
|          | -59.342  | -59.043                                 | -58.595  | -57.997  |
|          | -50.668  | -50.370                                 | -49.923  | -49.327  |
| -49.785  | -49.658  | -49.403                                 | -49.018  | -48.503  |
|          | -45.041  | -44.707                                 | -44.207  | -43.545  |
| -39.108  | -38.964  | -38.675                                 | -38.243  | -37.665  |
|          | -30.857  | -36.246                                 | -35.762  | -35.117  |
|          |          | $k=\text{odd}, (-1)^{J+P}=\text{odd}$   |          |          |
|          | 92.655   | -92.344                                 | -91.878  | -91.256  |
|          | -85.386  | -85.072                                 | -84.601  | -83.973  |
|          | -67.911  | -67.594                                 | -67.119  | -66.485  |
|          | -59.345  | -59.053                                 | -58.615  | -58.031  |
|          | -50.670  | -50.377                                 | -49.936  | -49.350  |
|          | -45.059  | -44.759                                 | -44.310  | -43.712  |
|          | -35.868  | -36.246                                 | -35.762  | -35.117  |
|          |          | -35.574                                 | -35.133  | -34.546  |
|          | -30.861  | -30.593                                 | -30.192  | -29.656  |
|          | -22.116  | -21.846                                 | -21.440  | -20.900  |

**Table SI III.** Calculated rovibrational energy levels (in  $\text{cm}^{-1}$ ) of the  $\text{H}_2\text{O}-^{84}\text{Kr}$  complex from the vibrationally averaged  $V_{\text{MLR}}$  PESs at the  $|02^+\rangle$  state.

| $J = 5$                                 | $J = 6$  | $J = 7$  | $J = 8$  | $J = 9$  | $J = 10$ |
|-----------------------------------------|----------|----------|----------|----------|----------|
| $k=\text{even}, (-1)^{J+P}=\text{even}$ |          |          |          |          |          |
| -118.331                                | -117.389 | -116.292 | -115.038 | -113.629 | -112.064 |
| -90.339                                 | -89.425  | -88.359  | -87.141  | -85.772  | -84.251  |
| -83.441                                 | -82.505  | -81.415  | -80.171  | -78.775  | -77.227  |
| -77.062                                 | -76.155  | -75.096  | -73.887  | -72.525  | -71.012  |
| -59.893                                 | -59.050  | -58.066  | -56.941  | -55.675  | -54.267  |
| -57.237                                 | -56.501  | -55.614  | -54.575  | -53.384  | -52.042  |
| -54.779                                 | -53.654  | -52.374  | -50.941  | -49.355  | -47.619  |
| -46.626                                 | -45.887  | -45.014  | -44.005  | -42.858  | -41.575  |
| -44.941                                 | -43.998  | -42.909  | -41.677  | -40.300  | -38.781  |
| -42.223                                 | -41.242  | -40.099  | -38.795  | -37.331  | -35.708  |
| $k=\text{even}, (-1)^{J+P}=\text{odd}$  |          |          |          |          |          |
| -83.427                                 | -82.485  | -81.386  | -80.131  | -78.720  | -77.153  |
| -56.472                                 | -55.543  | -54.461  | -53.225  | -51.835  | -50.292  |
| -45.264                                 | -44.414  | -43.421  | -42.284  | -41.004  | -39.581  |
| -42.227                                 | -41.250  | -40.113  | -38.817  | -37.362  | -35.750  |
| -27.960                                 | -27.147  | -26.192  | -25.092  | -23.848  | -22.458  |
| -26.558                                 | -25.596  | -24.481  | -23.213  | -21.793  | -20.223  |
| -22.729                                 | -21.970  | -21.057  | -19.990  | -18.770  | -17.397  |
| -20.562                                 | -19.432  | -18.147  | -16.710  | -15.123  | -13.391  |
| -14.180                                 | -13.361  | -12.403  | -11.305  | -10.064  | -8.678   |
| -8.670                                  | -7.774   | -6.731   | -5.540   | -4.203   | -2.721   |
| $k=\text{odd}, (-1)^{J+P}=\text{even}$  |          |          |          |          |          |
| -103.063                                | -102.139 | -101.061 | -99.831  | -98.447  | -96.911  |
| -90.423                                 | -89.470  | -88.358  | -87.089  | -85.664  | -84.081  |
| -83.150                                 | -82.193  | -81.077  | -79.802  | -78.368  | -76.774  |
| -70.227                                 | -69.339  | -68.304  | -67.122  | -65.792  | -64.317  |
| -57.251                                 | -56.356  | -55.313  | -54.123  | -52.786  | -51.303  |
| -48.583                                 | -47.690  | -46.650  | -45.463  | -44.133  | -42.676  |
| -47.856                                 | -47.074  | -46.155  | -45.096  | -43.894  | -42.530  |
| -42.723                                 | -41.742  | -40.607  | -39.320  | -37.885  | -36.304  |
| -36.944                                 | -36.078  | -35.068  | -33.913  | -32.613  | -31.167  |
| -34.310                                 | -33.342  | -32.214  | -30.926  | -29.478  | -27.872  |
| $k=\text{odd}, (-1)^{J+P}=\text{odd}$   |          |          |          |          |          |
| -90.480                                 | -89.549  | -88.464  | -87.225  | 85.832   | -84.286  |
| -83.189                                 | -82.247  | -81.149  | -79.894  | -78.483  | -76.915  |
| -65.693                                 | -64.743  | -63.635  | -62.370  | -60.948  | -59.370  |
| -57.302                                 | -56.427  | -55.408  | -54.244  | -52.936  | -51.486  |
| -48.616                                 | -47.737  | -46.711  | -45.540  | -44.223  | -42.761  |
| -42.964                                 | -42.066  | -41.019  | -39.822  | -38.476  | -36.981  |
| -34.312                                 | -33.346  | -32.221  | -30.937  | -29.499  | -27.973  |
| -33.813                                 | -32.933  | -31.907  | -30.736  | -29.415  | -27.881  |
| -28.988                                 | -28.186  | -27.252  | -26.185  | -24.986  | -23.656  |
| -20.225                                 | -19.416  | -18.472  | -17.395  | -16.185  | -14.842  |

**Table SIV.** Calculated infrared  $|02^-\rangle \leftarrow |00^+\rangle$  transition energies (in  $\text{cm}^{-1}$ ) of  $\text{H}_2\text{O}-^{84}\text{Kr}$  with the intensity at 18K.

| Transiton                                       | Cal.     | Line strength | Int.(18K) |
|-------------------------------------------------|----------|---------------|-----------|
| $\Sigma^e(1_{01}) \leftarrow \Sigma^e(0_{00})$  |          |               |           |
| R(0)                                            | 7260.911 | 0.432         | 0.153     |
| R(1)                                            | 7261.062 | 0.879         | 0.307     |
| R(2)                                            | 7261.210 | 1.342         | 0.456     |
| R(3)                                            | 7261.355 | 1.819         | 0.596     |
| R(4)                                            | 7261.497 | 2.312         | 0.720     |
| R(5)                                            | 7261.636 | 2.818         | 0.824     |
| R(6)                                            | 7261.772 | 3.339         | 0.906     |
| R(7)                                            | 7261.905 | 3.873         | 0.962     |
| R(8)                                            | 7262.034 | 4.420         | 0.993     |
| R(9)                                            | 7262.161 | 4.980         | 1.000     |
| P(1)                                            | 7260.599 | 0.416         | 0.145     |
| P(2)                                            | 7260.439 | 0.817         | 0.278     |
| P(3)                                            | 7260.276 | 1.202         | 0.393     |
| P(4)                                            | 7260.110 | 1.570         | 0.489     |
| P(5)                                            | 7259.941 | 1.923         | 0.563     |
| P(6)                                            | 7259.770 | 2.260         | 0.613     |
| P(7)                                            | 7259.596 | 2.582         | 0.641     |
| P(8)                                            | 7259.419 | 2.887         | 0.649     |
| P(9)                                            | 7259.240 | 3.177         | 0.638     |
| P(10)                                           | 7259.059 | 3.452         | 0.612     |
| $\Sigma^e(2_{02}) \leftarrow \Pi^{e/f}(1_{01})$ |          |               |           |
| Q(1)                                            | 7280.532 | 0.180         | 0.146     |
| Q(2)                                            | 7280.616 | 0.295         | 0.234     |
| Q(3)                                            | 7280.730 | 0.407         | 0.311     |
| Q(4)                                            | 7280.866 | 0.518         | 0.376     |
| Q(5)                                            | 7281.015 | 0.629         | 0.429     |
| Q(6)                                            | 7281.175 | 0.740         | 0.469     |
| Q(7)                                            | 7281.340 | 0.853         | 0.495     |
| Q(8)                                            | 7281.510 | 0.967         | 0.509     |
| Q(9)                                            | 7281.681 | 1.083         | 0.510     |
| Q(10)                                           | 7281.852 | 1.199         | 0.499     |
| P(2)                                            | 7280.210 | 0.352         | 0.278     |
| P(3)                                            | 7280.127 | 0.574         | 0.437     |
| P(4)                                            | 7280.071 | 0.826         | 0.598     |
| P(5)                                            | 7280.031 | 1.092         | 0.742     |
| P(6)                                            | 7280.003 | 1.363         | 0.858     |
| P(7)                                            | 7279.982 | 1.633         | 0.940     |
| P(8)                                            | 7279.963 | 1.898         | 0.987     |
| P(9)                                            | 7279.945 | 2.154         | 1.000     |
| P(10)                                           | 7279.925 | 2.400         | 0.982     |

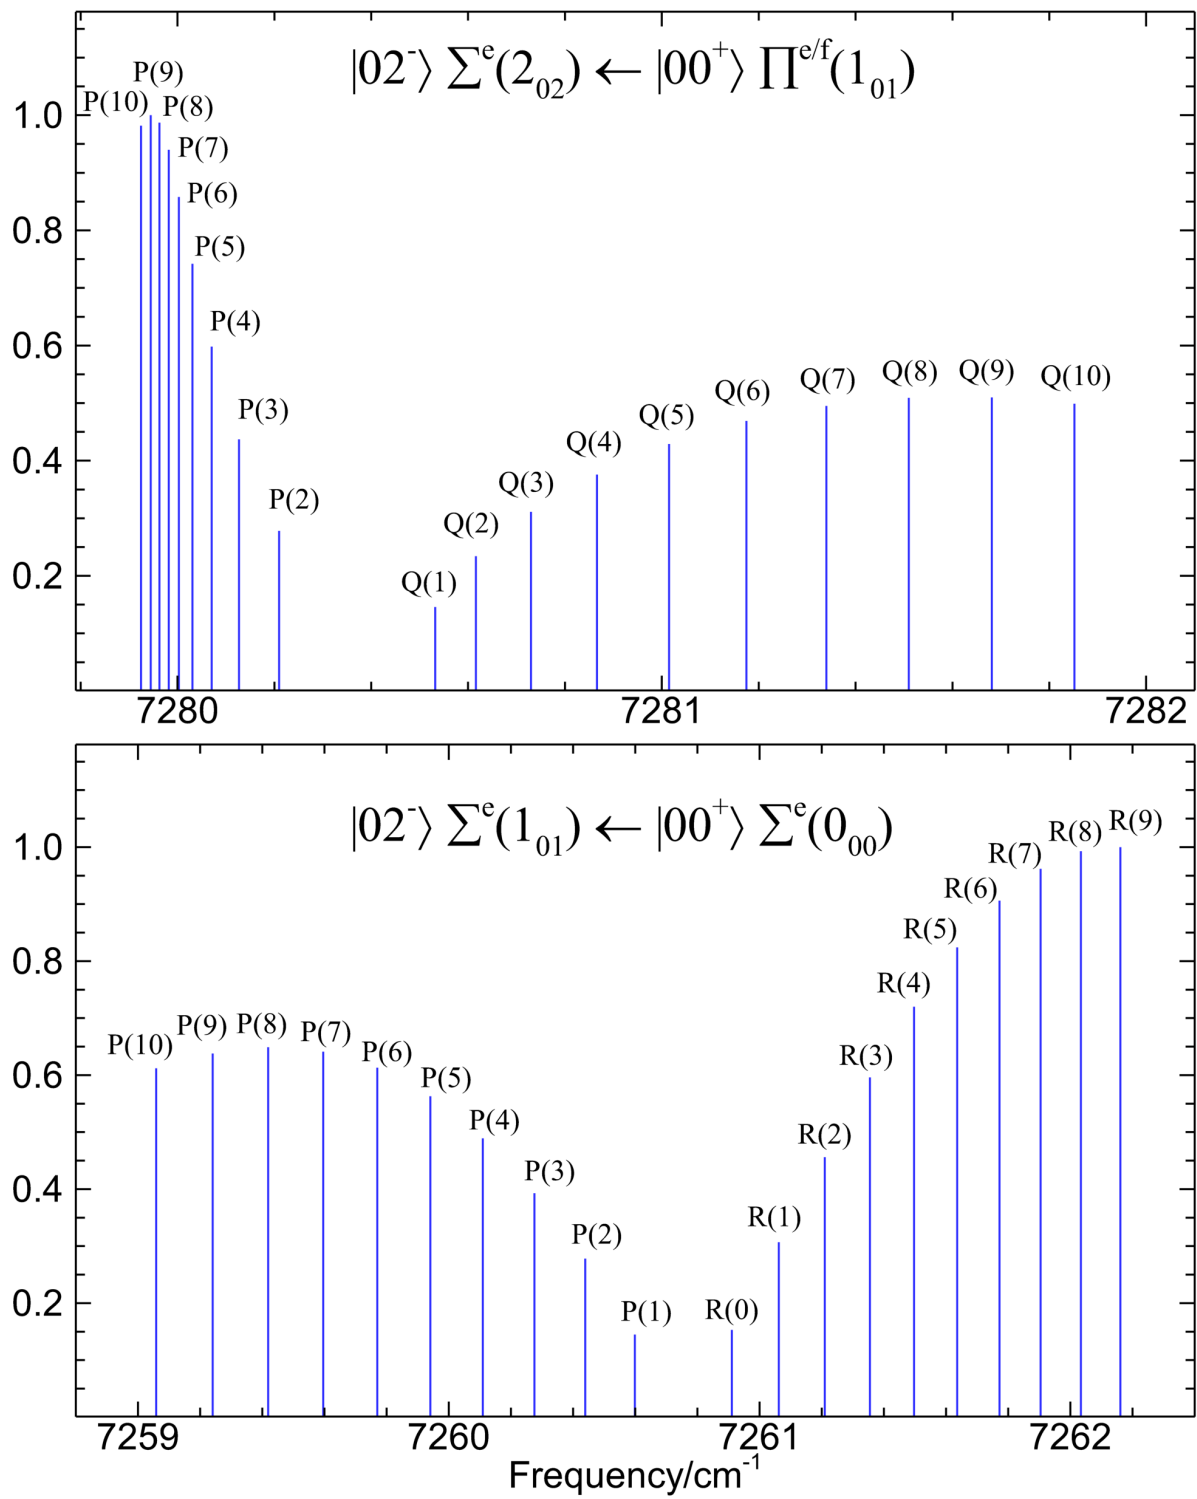

**Figure S1.** Simulated IR spectra of  $|02^- \rangle \leftarrow |00^+ \rangle$  in the 7259 – 7282 cm<sup>-1</sup> region for H<sub>2</sub>O-Kr at 18K.
